## 26 **Abstract**

27 As the field of synthetic biology moves towards the utilization of novel bacterial chassis,  
28 there is a growing need for biological parts with enhanced performance in a wide number of  
29 hosts. It is not unusual that biological parts (such as promoters and terminators), initially  
30 characterized in the model bacteria *Escherichia coli*, do not perform well when implemented  
31 in alternative hosts, such as *Pseudomonas*, therefore limiting the construction of synthetic  
32 circuits in industrially relevant bacteria. In order to address this limitation, we present here the  
33 mining of transcriptional terminators through functional metagenomics to identify novel parts  
34 with broad host-range activity. Using a GFP-based terminator trap strategy and a broad host-  
35 range plasmid, we identified 20 clones with potential terminator activity in *Pseudomonas*  
36 *putida*. Further characterization allowed the identification of 4 unique sequences between 58  
37 bp and 181 bp long that efficiently terminate transcription in *P. putida*, *E. coli*, *Burkholderia*  
38 *phyumatum* and two *Pseudomonas* strains isolated from Antarctica. Therefore, this work  
39 presents a new set of biological parts useful for the engineering of synthetic circuits in  
40 Proteobacteria.

41

## 42 **Introduction**

43 Bacteria play a central role in the biotechnology industry and the field of synthetic biology is  
44 rapidly growing towards the generation of novel tools and protocols for the engineering of  
45 these organisms<sup>1,2</sup>. In order to take advantage of their full potential, it is essential to have an  
46 efficient set of tools that can be used in organisms with relevant features related to the  
47 application intended. For example, *E. coli* is a classical host in terms of protein production  
48 and metabolic engineering<sup>3</sup>, while gram-positive bacteria such as *Streptomyces* hold the  
49 potential for the production of small bioactive molecules<sup>4</sup>. By the same token, the natural  
50 features of *Salmonella* make them a suitable host for tumor targeting applications<sup>5</sup>, while the

51 metabolic robustness and versatility of *Pseudomonas* make these bacteria promising chassis  
52 for harsh and intense industrial conditions <sup>6</sup>. Yet, most of genetic tools have been initially  
53 constructed for *E. coli* and it is not unusual that biological parts required for synthetic circuit  
54 assemble are not fully functional in alternative hosts <sup>2</sup>. In these cases, the initial failure of  
55 synthetic circuits constructed in alternative hosts leads to the need of intense re-adaptation of  
56 these parts to the new hosts <sup>7,8</sup>. Therefore, as synthetic biologists turn towards non-classical  
57 bacterial chassis, there is a growing demand for orthogonal systems that could efficiently  
58 operate in a broad number of hosts <sup>9,10</sup>. Attempts in this direction have been made towards the  
59 construction of novel expression systems <sup>11</sup>, transformation/DNA delivery strategies <sup>12,13</sup> and  
60 plasmid vectors <sup>14</sup>, among others.

61

62 Recently, several reports have described the construction of novel expression systems, based  
63 on inducible as well as constitutive promoters, both with narrow or wide host-range <sup>7,10,15,16,2</sup>.  
64 Yet, while much is known about transcription initiation, considerably less information is  
65 available about transcriptional termination <sup>17,18</sup>. In Bacteria, transcription termination occurs  
66 mainly through two mechanisms. In intrinsic termination – also termed Rho-independent  
67 termination –, strong secondary structures are formed at the 3' end of nascent RNA transcript  
68 which lead to the detachment of the RNA Polymerase (RNAP), and this mechanism does not  
69 seem to require any additional *trans* acting element <sup>17</sup>. On the other hand, Rho-dependent  
70 termination requires a helicase which navigates the mRNA and actively detaches paused  
71 RNAPs <sup>19</sup>. Similar mechanisms are found in Archaea and Eukarya <sup>20</sup>. For the construction of  
72 complex synthetic circuits, efficient transcription termination sequences are require to ensure  
73 insulation of each part of the system. Failure in this process could lead to unwanted regulatory  
74 interactions. Yet, while some recent works have systematically characterized intrinsic  
75 terminators in bacteria, this has been mainly performed in the model organism *E. coli* <sup>21,22</sup>.

76 Therefore, there are few well-characterized fully functional terminator sequences that can be  
77 used in different bacterial hosts. In this sense, functional metagenomics holds the potential to  
78 access a great diversity of biological parts that can be used in a number of applications<sup>23,24</sup>. In  
79 this work, we search for novel transcriptional terminators in soil microbial communities by a  
80 functional metagenomic approach. Using a GFP-based terminator trap broad host-range  
81 vector, we identified several candidate sequences by the functional screening of a  
82 metagenomic library constructed in *Pseudomonas putida*. We demonstrated that these new  
83 terminator sequences are functional in several Proteobacteria, including *E. coli*, and this new  
84 set of tools could be useful for novel synthetic biology projects in non-classical chassis.

85

## 86 **Results and discussion**

87

### 88 *Mining transcriptional terminators in metagenomic libraries*

89 As presented above, while many transcriptional terminators have been well-characterized in *E.*  
90 *coli*, only few functional terminators are available for non-classical bacteria. As an example,  
91 the widely used minimal lambda T1 terminator from *E. coli* is not fully functional in *P. putida*  
92 KT2440, as this element allows readthrough when placed in broad host-range vectors (**Fig.**  
93 **S1**). In this sense, we hypothesize that an optimal terminator screening strategy would require  
94 these elements to be first validated in the organism of interest and only then assayed in *E. coli*.  
95 The overall strategy used in this work is schematically represented in **Fig. 1**. In order to  
96 identify novel transcriptional terminator elements, we constructed a metagenomic library  
97 from eDNA extracted from soil samples. For this purpose, a strong constitutive promoter  
98 (BBa\_J23100) controlling the expression of a GFP<sub>Iva</sub> reporter was cloned into the broad-host  
99 range vector pSEVA231<sup>14</sup>. The resulting reporter vector was used for terminator trapping by  
100 cloning the eDNA in the region between the promoter and the ribosome binding site of

101 GFP<sub>Iva</sub> (**Fig. 1**). The constructs were introduced in *P. putida* KT2440 and the metagenomic  
 102 library was screened for the lack or reduction in GFP signal. Using this approach, a total of  
 103 163 colonies were screened and 20 colonies with apparent GFP signal reduction/absence were  
 104 selected for further validation. Plasmid DNA extraction, digestion and DNA sequencing  
 105 revealed that all 20 clones presented a DNA fragment ranging from 58 to 424 bp, with an  
 106 average insert length of 211 bp (**Table S1**). These clones were randomly named T1 to T20  
 107 and were used for further experimental validation as described below. **Table S2** provides  
 108 information about sequence similarity, both at nucleotide and amino-acid level, of the  
 109 metagenomic inserts.

110

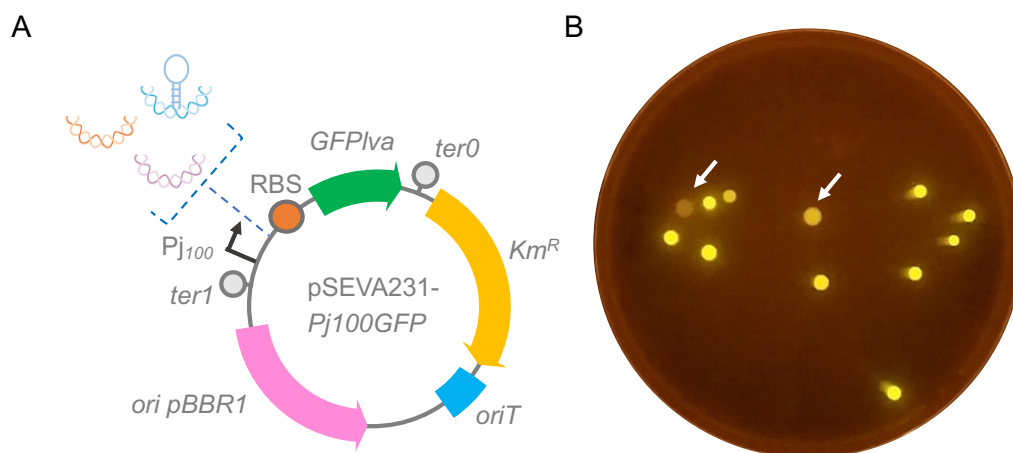

111

112 **Figure 1. Schematic representation of the strategy used in this study.** **A)** Metagenomic  
 113 DNA fragments carrying potential transcriptional terminators were cloned between the strong  
 114 promoter *Pj<sub>100</sub>* and the RBS (ribosome-binding site) in the reporter trap-vector pSEVA231-  
 115 *Pj100GFP*. Functional elements of the plasmid backbone are shown: *Km<sup>R</sup>*, antibiotic  
 116 resistance marker; *oriT*, origin of transfer; *ori pBBR1*, broad host-range origin of replication;  
 117 *ter1* and *ter0*, transcriptional terminators. **B)** Metagenomic library clones presenting lack or  
 118 reduction in GFP signal, in a blue-light transilluminator, are indicated by arrows.

119

120 Diverse algorithms (Mfold and ARNold, FindTerm<sup>25</sup>) were applied in order to identify  
 121 potential intrinsic terminators present in all the eDNA sequences cloned. FindTerm retrieved  
 122 T18 as the only putative Rho-independent terminator, while the analysis of RNA secondary  
 123 structure with Mfold allowed identifying a putative typical Rho-independent terminator in T1

124 sequence. As these algorithms are designed to search for typical Rho-independent  
125 transcriptional terminator motifs, a hairpin structure followed by a poly-U tract, the presence  
126 of Rho-dependent terminators or even unusual Rho-independent terminators in the  
127 metagenomic sequences cannot be discarded, considering the diverse phylogenetic origin of  
128 the DNA sequences screened <sup>26,27</sup>.

129

### 130 *The novel transcriptional terminators display broad host-range activity*

131 Once we identified candidate terminators in *P. putida*, we further characterize these sequences  
132 by assessing *in vivo* terminator activity in liquid media. As shown in **Fig. 2A**, for seven  
133 selected candidate terminators all strains presented reduced GFP expression when compared  
134 to the positive control harboring pSEVA231-*Pj100GFP* plasmid, where no sequence is  
135 inserted between the strong promoter and the reporter gene. While some sequences presented  
136 only partial terminator activity (T2 and T3), others presented expression levels very close to  
137 the negative control harboring pSEVA231 plasmid (such as for T1, T7 and T9). It is worth  
138 noting that these three sequences were very short (between 58 and 181 bp long) (**Table S1**),  
139 resulting thus into promising new sequences for transcriptional termination in *P. putida*. The  
140 terminator effect was maintained for all constructs over a period of 8 hours (**Fig. 2B**). As  
141 shown in **Fig. 2C**, the presence of eDNA in the constructs has no significant effect in the  
142 growth pattern when compared to the presence of pSEVA231-*Pj100GFP* and pSEVA231  
143 plasmids. The characterization of the remaining 13 candidate sequences evidenced a wide  
144 range of termination efficiencies (**Fig. S2**).

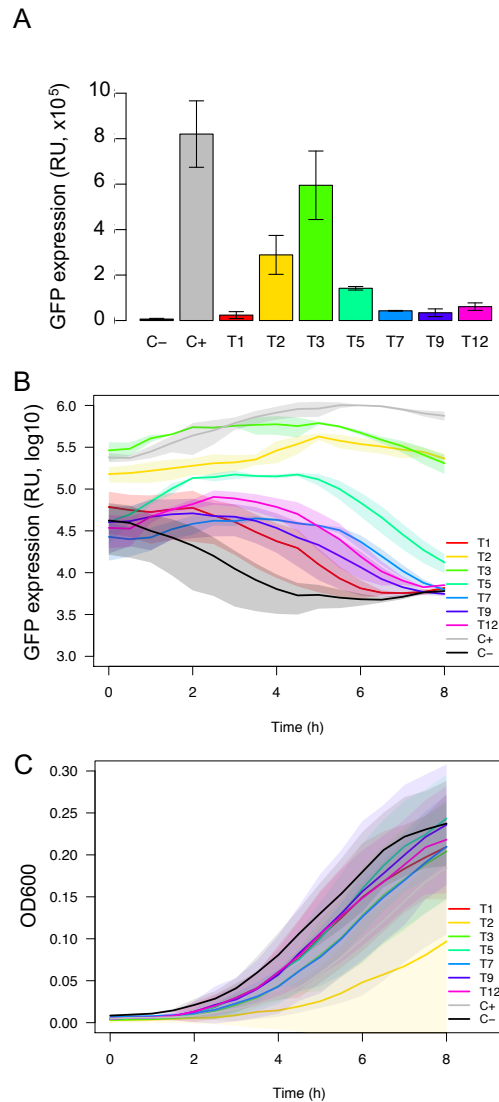

145

146 **Figure 2. Characterization of novel terminators in *P. putida* KT2440.** In order to  
 147 characterize the transcriptional termination effect in selected metagenomic clones, *P. putida*  
 148 KT2440 strains harboring the different reporter plasmids were grown in liquid M9-glycemia  
 149 during 8h and the optical density at 600 nm (OD600) and fluorescence (GFP) were measured  
 150 every 30 min . Strains harboring either pSEVA231 or pSEVA231-Pj100GFP were used as  
 151 positive (C+) and negative (C-) controls, respectively. **A)** Terminator activity at 4h **B)**  
 152 Terminator activity (in log<sub>10</sub> scale) over time. **C)** Growth curve of the strains.

153 All graphs represent the average from three independent experiments. Standard deviation  
 154 from three experiments is represented as vertical bars in A and as shaded regions in B and C .

155

156 Once we analyzed the terminators in *P. putida*, we investigated their functionality in four  
 157 additional Proteobacteria host. For this purpose, we introduced the plasmids presented in Fig.  
 158 2 into *E. coli* DH10B, *B. phymatum* STM815<sup>T</sup> and two psychrotolerant *Pseudomonas* strains  
 159 isolated from Antarctica <sup>28</sup>, named as *Pseudomonas* spp. UYIF39 and *Pseudomonas* spp.

160 *UYIF41*. As shown in **Fig. 3A-B**, all tested *E. coli* strains presented GFP expression levels  
161 virtually undistinguishable from the negative control, indicating that all 7 terminator  
162 sequences were fully functional in this host. This result strength the notion that functional  
163 terminator in *E. coli* are not always active in other hosts such as *P. putida*. It is worth  
164 mentioning that plasmids were extracted from *E. coli* and the presence of the terminator  
165 sequences originally identified in *P. putida* were confirmed by PCR. When these terminators  
166 were analyzed in *B. phymatum* and the two psychrotolerant *Pseudomonas* strains (**Fig. 3C-H**),  
167 the termination profile was very similar to that of *P. putida*, where T1 was the most effective  
168 terminator in all strains and a host-dependent efficiency for T7, T9 and T12 was observed.  
169 Also, the introduction of these constructs in all four strains did not cause any defect in growth  
170 under the experimental conditions assayed (**Fig. S3**). Taken together, these results  
171 demonstrate that the novel terminators identified in this work are highly functional in a broad  
172 range of bacterial strains.



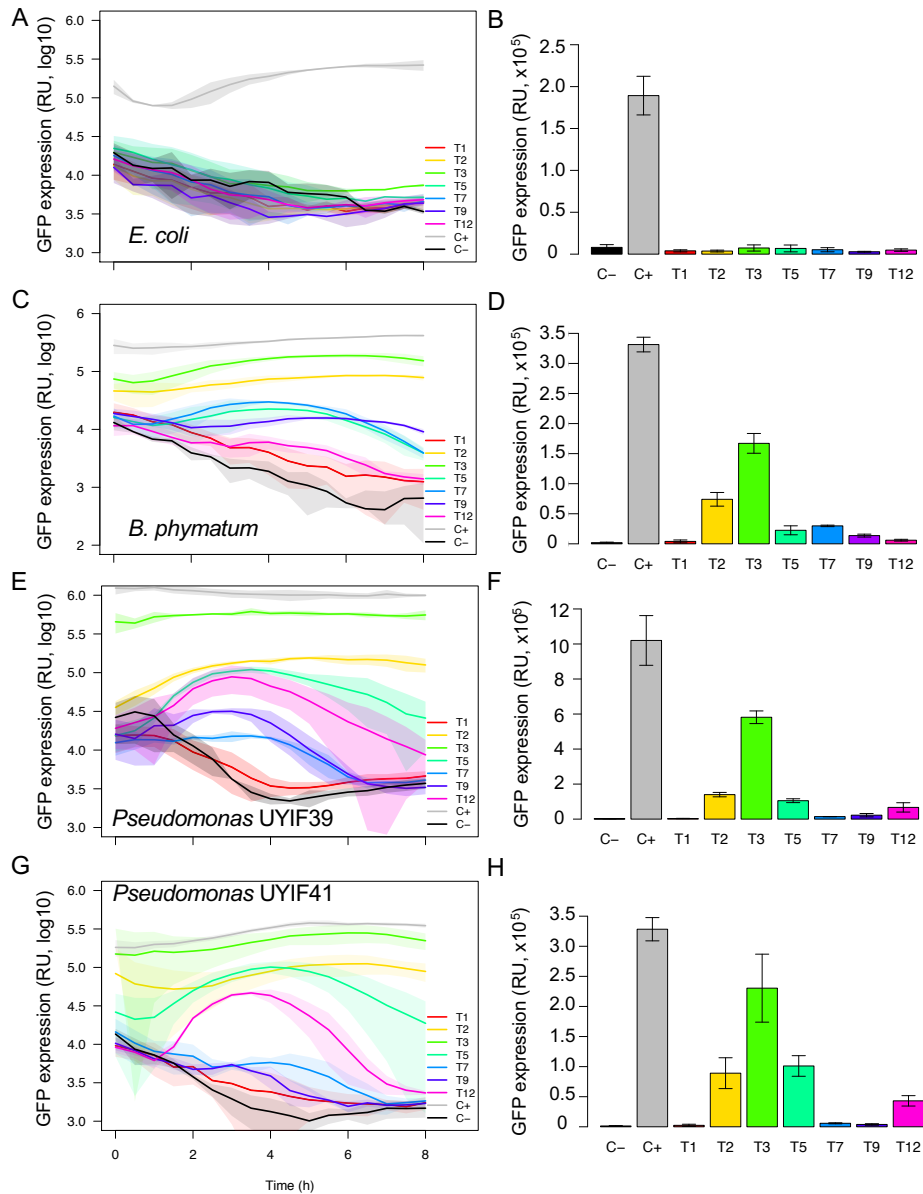

173

174 **Figure 3. Characterization of novel terminators in alternative hosts.** In order to  
 175 characterize the transcriptional termination effect in alternative hosts other than *P. putida*,  
 176 plasmids were transferred to *E. coli*, *B. phymatum* and the psychrotolerant *Pseudomonas*  
 177 *sp.*UYIF39 and UYIF41. All the strains were grown in liquid M9, with the appropriate carbon  
 178 source, during 8h and the optical density at 600 nm (OD<sub>600</sub>) and fluorescence (GFP) were  
 179 measured every 30 min. Strains harboring either pSEVA231 or pSEVA231-Pj100GFP were  
 180 used as positive (C+) and negative (C-) controls, respectively. **A**) Terminator activity (in  
 181 log<sub>10</sub> scale) of *E. coli* strains over time. **B**) Terminator activity of the *E. coli* strains at 4h. **C**)  
 182 Terminator activity (in log<sub>10</sub> scale) of *B. phymatum* strains over time. **D**) Terminator activity  
 183 of *B. phymatum* strains at 4h. **E**) Terminator activity (in log<sub>10</sub> scale) of the *Pseudomonas*  
 184 *sp.*UYIF39 strains over time. **F**) Terminator activity of the *Pseudomonas sp.* UYIF39 strains  
 185 at four 4h. **G**) Terminator activity (in log<sub>10</sub> scale) of the *Pseudomonas sp.*UYIF41 strains  
 186 over time. **H**) Terminator activity of the *Pseudomonas sp.*UYIF41 strains at 4h. All graphs  
 187 represent the average from three independent experiments. Standard deviation from three  
 188 experiments is represented as shaded regions in A, C, E and G, and as vertical bars in B, D, F  
 189 and H.

190 *The novel terminators are functional at single cell level*

191 While most characterization of biological parts are usually performed at population levels, the  
 192 role of cell individuality is widely recognized as crucial for network performance <sup>29</sup>. In this  
 193 sense, bacterial expression systems are usually categorized as having graded or all-or-none  
 194 behavior, and these have strong consequences for the final circuit dynamics <sup>30,31</sup>. Therefore,  
 195 we decided to investigate how the newly-identified terminators behave at the single-cell level.  
 196 For this purpose, the three best terminators (T1, T7 and T9) were assayed by flow cytometry  
 197 in the five hosts. As shown in **Fig. 4**, while terminator T1 displayed a low-expression  
 198 dynamics with a single population of cells similar to the negative control in all strains,  
 199 terminators T7 and T9 displayed a low-expression population with broader distribution than  
 200 the negative control, being distribution strain-dependent. In this sense, strains *P. putida*, *B.*  
 201 *phymatum* and *Pseudomonas* spp.UYIF39 were more heterogeneous, yet with a single  
 202 population present. Taken together, these results demonstrated that three of the strongest  
 203 terminators identified in this work are efficient in transcription termination at the single-cell  
 204 level as none of them displayed both, active and inactive, populations.

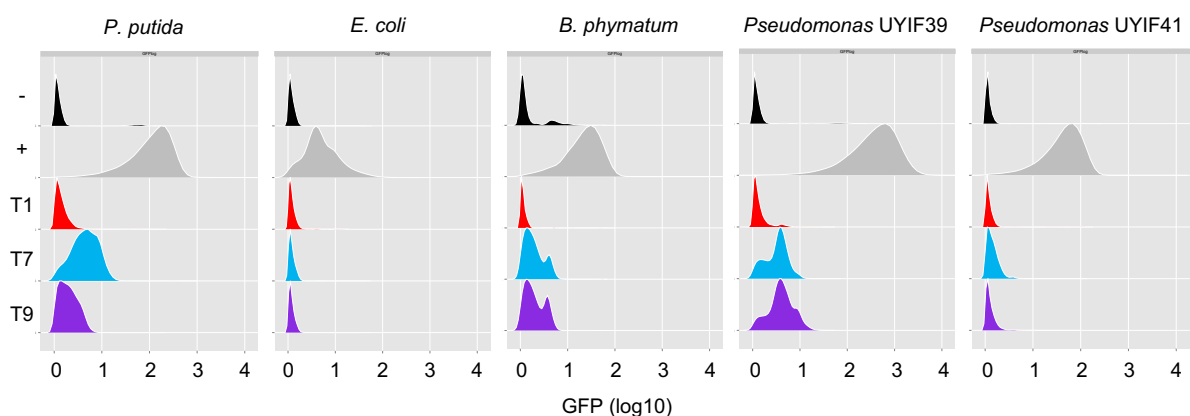

205

206 **Figure 4. Flow cytometry analysis of three broad-host range terminators in different**  
 207 **hosts.** Strains were grown in M9 media supplemented with an appropriate carbon source for  
 208 4 hours and analyzed by flow cytometry. Data from 20,000 events were collected and  
 209 processed using flowCore and flowViz packages in R. The results are representative of three  
 210 independent experiments. Strains harboring either pSEVA231 or pSEVA231-Pj100GFP were  
 211 used as positive (+) and negative (-) controls, respectively.

212

## 213 **Conclusions**

214

215 In this work, we present a strategy for the mining of novel functional terminator sequences in  
216 Proteobacteria other than *E. coli*. Using a functional metagenomic approach, twenty  
217 terminators with different efficiencies and host-dependency were identified, being the most  
218 promising ones less than 200 bp. This set of new, short, and wide host-range terminator  
219 sequences could be crucial for future synthetic biology projects requiring complex circuits,  
220 since re-use of parts could lead to DNA rearrangements due to homologous recombination  
221 events. Also, the fact that these new elements are functional in several bacteria allows the user  
222 to construct and test the circuit in one host and then implement it in a different one without  
223 the loss of functionality. We anticipate that similar functional metagenomic approaches could  
224 be used in the future to mine other broad host-range elements, such as RBS and promoters,  
225 increasing the toolbox for the construction of truly orthogonal synthetic circuits.

226

## 227 **Methods**

228

### 229 *Bacterial strains, plasmids and growth conditions*

230 Bacteria and plasmids used in this study are detailed in supplementary **Table S3**. *E. coli* and  
231 *Pseudomonas* strains were grown aerobically at 30 °C and 200 rpm in either LB or M9  
232 minimal media <sup>32</sup> supplemented with 0.1 mM casamino acids and 1% glycerol as carbon  
233 source (M9-gly). *Burkholderia* strains were grown in either TY <sup>32</sup> or M9 minimal media  
234 supplemented with 0.1 mM casamino acids and 0.2% citrate. When required, 50 µg/ml  
235 kanamycin (Km) or 25 µg/ml chloramphenicol (Cm) were added to the media.

236

### 237 *Construction of the metagenomic library*

238 In order to build the terminator trap vector, a 857 pb DNA fragment harboring the GFP<sub>Iva</sub>  
239 protein under the control of a strong synthetic constitutive promoter (BBa\_J23100) was  
240 obtained from pMR1-*Pj100* plasmid <sup>33</sup>, after digestion with HindIII/EcoRI. The resulting  
241 *Pj100*GFP region was later cloned at the HindIII/EcoRI sites of pSEVA231 <sup>14</sup>, generating  
242 plasmid pSEVA231-*Pj100*GFP that was used for terminator trapping in environmental  
243 metagenomic DNA (eDNA). For this purpose, previously isolated eDNAs <sup>34</sup> obtained from  
244 soil samples were partially digested with Sau3AI enzyme to produce fragments between 100  
245 bp and 400 bp that were cloned at the BamHI site of pSEVA231-*Pj100*GFP, which is located  
246 between *Pj100* promoter and the ribosome binding site (RBS) of GFP<sub>Iva</sub> gene. The constructs  
247 were introduced in *P. putida* by electroporation. The metagenomic library was plated in LB  
248 Km and colonies were screened for the lack or reduction in GFP signal in a blue-light  
249 transilluminator. Colonies harboring putative terminator sequences from eDNA origin were  
250 selected for further analysis.

251

#### 252 *Analysis of transcriptional terminator activity*

253 In order to quantify the termination efficiency, *P. putida* harboring putative transcriptional  
254 terminators were used to assess GFP expression *in vitro*. Single colonies were grown overnight  
255 in M9-gly at 30°C and 200 rpm. The overnight growth was placed in a 96-well plate diluted  
256 for 1:20 in 200 µl of M9-gly. The analysis was made using a Victor X3 plate reader  
257 (PerkinElmer) over a period of eight hours at 30 °C, measuring every 30 minutes the optical  
258 density 600 nm (OD) and fluorescence (excitation 488 nm and emission 535 nm). *P. putida*  
259 harboring either pSEVA231 or pSEVA231-*Pj100*GFP were used as negative and positive  
260 controls, respectively. All assays were done in technical triplicates in the same plate and in  
261 biological triplicates in different experiments.

262

263 To assess the effectiveness of the terminator sequences found in *P. putida* in other  
264 Proteobacteria hosts, seven constructs were selected based on the strength of the putative  
265 terminator effect. Five plasmids harboring efficient terminator sequences (T1, T5, T7, T9,  
266 T12) and two plasmids harboring medium terminators (T2 and T3) were obtained from *P.*  
267 *putida* and used to transform *E. coli*, *Pseudomonas* UYIF39, *Pseudomonas* UYIF41 and *B.*  
268 *phymatum* by electroporation. As negative and positive controls, all strains were transformed  
269 with either pSEVA231 or pSEVA231-*Pj100GFP*, respectively. For quantification of the  
270 termination efficiency in these hosts, GFP expression was assessed *in vitro* as mentioned  
271 before for *P. putida*, performing it at 30 °C for *E. coli*, 30 °C for *B. phymatum* and 25 °C for  
272 *Pseudomonas* UYIF39 and UYIF41. For *B. phymatum*, M9-fruc media was used. The results  
273 were processed in R program (<https://www.r-project.org/>) using *ad hoc* scripts.

274

275 In order to evaluate the termination efficiency at the single cell level, flow cytometry analysis  
276 was made for terminators T1, T7 and T9 in all hosts. For this purpose, a single colony from *P.*  
277 *putida*, *E. coli*, *Pseudomonas* UYIF39, *Pseudomonas* UYIF41 and *B. phymatum* strains  
278 harboring each of these constructs, plasmid pSEVA231 and plasmid pSEVA231-*Pj100GFP*  
279 were grown overnight in M9 media as aforementioned. Cells were diluted 1:10 in fresh M9  
280 appropriate media and grown for an additional 6 hours. Cultures were stored in ice and  
281 sequentially analyzed on the Millipore Guava EasyCyte Mini Flow Cytometer, to quantify  
282 GFP fluorescence. For each sample three independent experiments were made. The data  
283 generated was processed with R scripts (<https://www.r-project.org/>), using the flowCore and  
284 flowViz packages, available on Bioconductor (<https://bioconductor.org/>).

285

286 *Analysis of terminator sequences*

287 Putative terminators were sequenced using primer SEVA231F (5'-TCC GTA TGT TGC ATC  
288 ACC-3'). Sequences were trimmed from primers and subject to comparison with NCBI  
289 database using the BLAST algorithm (Blastn and Blastp). Sequences were aligned using  
290 ClustalW <sup>35</sup>. Putative secondary structure of the terminator sequences at the RNA level were  
291 predicted with Mfold <sup>36</sup> using default parameters. For the prediction of transcriptional  
292 terminators, programs ARNold (<http://rna.igmors.u-psud.fr/toolbox/arnold/>) and FindTerm <sup>25</sup>  
293 were used with default parameters.

294

### 295 **Funding**

296 This work was supported by the Young Research Awards by the Sao Paulo State Foundation  
297 (FAPESP, award numbers 2015/04309-1 and 2012/21922-8). VA and ASM are beneficiaries  
298 of National Agency for Research and Innovation (ANII) and FAPESP fellowships (VA,  
299 MOV\_CA\_2017\_1\_138168; AS-M, FAPESP PhD fellowship number 2018/04810-0),  
300 respectively.

301

### 302 **Acknowledgments**

303 The authors are thankful to lab colleagues for insightful discussion about this manuscript.

304

### 305 **References**

306

- 307 (1) Church, G. M.; Elowitz, M. B.; Smolke, C. D.; Voigt, C. A.; Weiss, R. Realizing the  
308 Potential of Synthetic Biology. *Nat Rev Mol Cell Biol* **2014**, *15* (4), 289–294.  
309 <https://doi.org/10.1038/nrm3767>.
- 310 (2) Nora, L. C.; Westmann, C. A.; Martins-Santana, L.; Alves, L. de F.; Monteiro, L. M.  
311 O.; Guazzaroni, M.-E.; Silva-Rocha, R. The Art of Vector Engineering: Towards the

- 312 Construction of next-Generation Genetic Tools. *Microb. Biotechnol.* **2018**.  
313 <https://doi.org/10.1111/1751-7915.13318>.
- 314 (3) Keasling, J. D. Synthetic Biology for Synthetic Chemistry. *ACS Chem. Biol.* **2008**, *3*  
315 (1), 64–76. <https://doi.org/10.1021/cb7002434>.
- 316 (4) Phelan, R. M.; Sachs, D.; Petkiewicz, S. J.; Barajas, J. F.; Blake-Hedges, J. M.;  
317 Thompson, M. G.; Reider Apel, A.; Rasor, B. J.; Katz, L.; Keasling, J. D. Development  
318 of Next Generation Synthetic Biology Tools for Use in *Streptomyces Venezuelae*. *ACS*  
319 *Synth Biol* **2017**, *6* (1), 159–166. <https://doi.org/10.1021/acssynbio.6b00202>.
- 320 (5) Nguyen, V. H.; Kim, H. S.; Ha, J. M.; Hong, Y.; Choy, H. E.; Min, J. J. Genetically  
321 Engineered *Salmonella Typhimurium* as an Imageable Therapeutic Probe for Cancer.  
322 *Cancer Res.* **2010**, *70* (1), 18–23. <https://doi.org/10.1158/0008-5472.CAN-09-3453>.
- 323 (6) Poblete-Castro, I.; Becker, J.; Dohnt, K.; dos Santos, V. M.; Wittmann, C. Industrial  
324 Biotechnology of *Pseudomonas Putida* and Related Species. *Appl. Microbiol.*  
325 *Biotechnol.* **2012**, *93* (6), 2279–2290. <https://doi.org/10.1007/s00253-012-3928-0>.
- 326 (7) Markley, A. L.; Begemann, M. B.; Clarke, R. E.; Gordon, G. C.; Pfleger, B. F.  
327 Synthetic Biology Toolbox for Controlling Gene Expression in the Cyanobacterium  
328 *Synechococcus Sp.* Strain PCC 7002. *ACS Synth Biol* **2015**, *4* (5), 595–603.  
329 <https://doi.org/10.1021/sb500260k>.
- 330 (8) Kim, J.; Salvador, M.; Saunders, E.; González, J.; Avignone-Rossa, C.; Jiménez, J. I.  
331 Properties of Alternative Microbial Hosts Used in Synthetic Biology: Towards the  
332 Design of a Modular Chassis. *Essays Biochem.* **2016**, *60* (4), 303–313.  
333 <https://doi.org/10.1042/EBC20160015>.
- 334 (9) Rhodius, V. A.; Segall-Shapiro, T. H.; Sharon, B. D.; Ghodasara, A.; Orlova, E.;  
335 Tabakh, H.; Burkhardt, D. H.; Clancy, K.; Peterson, T. C.; Gross, C. A.; et al. Design  
336 of Orthogonal Genetic Switches Based on a Crosstalk Map of Sigmas, Anti-Sigmas,

- 337 and Promoters. *Mol. Syst. Biol.* **2013**, *9*, 702. <https://doi.org/10.1038/msb.2013.58>.
- 338 (10) Loeschcke, A.; Markert, A.; Wilhelm, S.; Wirtz, A.; Rosenau, F.; Jaeger, K. E.;  
339 Drepper, T. TREX: A Universal Tool for the Transfer and Expression of Biosynthetic  
340 Pathways in Bacteria. *ACS Synth. Biol.* **2013**, *2* (1), 22–33.  
341 <https://doi.org/10.1021/sb3000657>.
- 342 (11) Peters, J. M.; Koo, B.-M.; Patino, R.; Heussler, G. E.; Inclan, Y. F.; Hawkins, J. S.; S  
343 Lu, C. H.; Michael Harden, M.; Peters, J. E.; Engel, J. N.; et al. Mobile-CRISPRi:  
344 Enabling Genetic Analysis of Diverse Bacteria. *bioRxiv* **2018**, 315499.  
345 <https://doi.org/10.1101/315499>.
- 346 (12) Choi, K. H.; DeShazer, D.; Schweizer, H. P. Mini-Tn7 Insertion in Bacteria with  
347 Multiple GlmS-Linked AttTn7 Sites: Example Burkholderia Mallei ATCC 23344. *Nat.*  
348 *Protoc.* **2006**, *1* (1), 162–169. <https://doi.org/10.1038/nprot.2006.25>.
- 349 (13) Brophy, J. A. N.; Triassi, A. J.; Adams, B. L.; Renberg, R. L.; Stratis-Cullum, D. N.;  
350 Grossman, A. D.; Voigt, C. A. Engineered Integrative and Conjugative Elements for  
351 Efficient and Inducible DNA Transfer to Undomesticated Bacteria. *Nat. Microbiol.*  
352 **2018**, *1*. <https://doi.org/10.1038/s41564-018-0216-5>.
- 353 (14) Silva-Rocha, R.; Martínez-García, E.; Calles, B.; Chavarría, M.; Arce-Rodríguez, A.;  
354 de las Heras, A.; Páez-Espino, A. D.; Durante-Rodríguez, G.; Kim, J.; Nikel, P. I. The  
355 Standard European Vector Architecture (SEVA): A Coherent Platform for the Analysis  
356 and Deployment of Complex Prokaryotic Phenotypes. *Nucleic Acids Res.* **2013**, *41*  
357 (D1), D666–D675.
- 358 (15) Wang, B.; Barahona, M.; Buck, M. Amplification of Small Molecule-Inducible Gene  
359 Expression via Tuning of Intracellular Receptor Densities. *Nucleic Acids Res.* **2015**, *43*,  
360 1955–1964. <https://doi.org/10.1093/nar/gku1388>.
- 361 (16) Topp, S.; Reynoso, C. M. K.; Seeliger, J. C.; Goldlust, I. S.; Desai, S. K.; Murat, D.;



- 362 Shen, A.; Puri, A. W.; Komeili, A.; Bertozzi, C. R.; et al. Synthetic Riboswitches That  
363 Induce Gene Expression in Diverse Bacterial Species. *Appl. Environ. Microbiol.* **2010**,  
364 *76* (23), 7881–7884. <https://doi.org/10.1128/AEM.01537-10>.
- 365 (17) Peters, J. M.; Vangeloff, A. D.; Landick, R. Bacterial Transcription Terminators: The  
366 RNA 3'-End Chronicles. *J. Mol. Biol.* **2011**, *412* (5), 793–813.  
367 <https://doi.org/10.1016/j.jmb.2011.03.036>.
- 368 (18) Ray-Soni, A.; Bellecourt, M. J.; Landick, R. Mechanisms of Bacterial Transcription  
369 Termination: All Good Things Must End. *Annu. Rev. Biochem.* **2016**.  
370 <https://doi.org/10.1146/annurev-biochem-060815-014844>.
- 371 (19) Epshtein, V.; Dutta, D.; Wade, J.; Nudler, E. An Allosteric Mechanism of Rho-  
372 Dependent Transcription Termination. *Nature* **2010**, *463* (7278), 245–249.  
373 <https://doi.org/10.1038/nature08669>.
- 374 (20) Grohmann, D.; Werner, F. Recent Advances in the Understanding of Archaeal  
375 Transcription. *Curr Opin Microbiol* **2011**, *14* (3), 328–334.  
376 <https://doi.org/10.1016/j.mib.2011.04.012>.
- 377 (21) Cambray, G.; Guimaraes, J. C.; Mutalik, V. K.; Lam, C.; Mai, Q. A.; Thimmaiah, T.;  
378 Carothers, J. M.; Arkin, A. P.; Endy, D. Measurement and Modeling of Intrinsic  
379 Transcription Terminators. *Nucleic Acids Res.* **2013**, *41* (9), 5139–5148.  
380 <https://doi.org/10.1093/nar/gkt163>.
- 381 (22) Chen, Y. J.; Liu, P.; Nielsen, A. A.; Brophy, J. A.; Clancy, K.; Peterson, T.; Voigt, C.  
382 A. Characterization of 582 Natural and Synthetic Terminators and Quantification of  
383 Their Design Constraints. *Nat. Methods* **2013**, *10* (7), 659–664.  
384 <https://doi.org/10.1038/nmeth.2515>.
- 385 (23) Guazzaroni, M.-E.; Silva-Rocha, R.; Ward, R. J. Synthetic Biology Approaches to  
386 Improve Biocatalyst Identification in Metagenomic Library Screening. *Microb.*

- 387 *Biotechnol.* **2015**, *8*, 52–64. <https://doi.org/10.1111/1751-7915.12146>.
- 388 (24) Van Der Helm, E.; Genee, H. J.; Sommer, M. O. A. The Evolving Interface between  
389 Synthetic Biology and Functional Metagenomics. *Nature Chemical Biology*. Nature  
390 Publishing Group August 2018, pp 752–759. <https://doi.org/10.1038/s41589-018-0100->  
391 [x](https://doi.org/10.1038/s41589-018-0100-x).
- 392 (25) Solovyev, V.; Salamov, a. Automatic Annotation of Microbial Genomes and  
393 Metagenomic Sequences. *Metagenomics its Appl. Agric. Biomed. Environ. Stud. (Ed.*  
394 *RW Li), Nov. Sci. Publ.* **2011**.
- 395 (26) Ermolaeva, M. D.; Khalak, H. G.; White, O.; Smith, H. O.; Salzberg, S. L. Prediction  
396 of Transcription Terminators in Bacterial Genomes. *J. Mol. Biol.* **2000**.  
397 <https://doi.org/10.1006/jmbi.2000.3836>.
- 398 (27) Miravet-Verde, S.; Lloréns-Rico, V.; Serrano, L. Alternative Transcriptional  
399 Regulation in Genome-Reduced Bacteria. *Current Opinion in Microbiology*. 2017.  
400 <https://doi.org/10.1016/j.mib.2017.10.022>.
- 401 (28) Ferrés, I.; Amarelle, V.; Noya, F.; Fabiano, E. IFerrés, I., Amarelle, V., Noya, F., &  
402 Fabiano, E. (2015). Identification of Antarctic Culturable Bacteria Able to Produce  
403 Diverse Enzymes of Potential Biotechnological Interest. *Advances in Polar Science*,  
404 *26*(1), 71–79. Retrieved from [Http://Journal.Polar](http://Journal.Polar). *Adv. Polar Sci.* **2015**, *26* (1), 71–79.
- 405 (29) Elowitz, M. B.; Levine, A. J.; Siggia, E. D.; Swain, P. S. Stochastic Gene Expression in  
406 a Single Cell. *Science (80-. )*. **2007**, *297*, 1183–1186.  
407 <https://doi.org/10.1126/science.1070919>.
- 408 (30) Khlebnikov, A.; Datsenko, K. A.; Skaug, T.; Wanner, B. L.; Keasling, J. D.  
409 Homogeneous Expression of the P(BAD) Promoter in Escherichia Coli by Constitutive  
410 Expression of the Low-Affinity High-Capacity AraE Transporter. *Microbiology* **2001**,  
411 *147* (Pt 12), 3241–3247.

- 412 (31) Silva-Rocha, R.; de Lorenzo, V. Noise and Robustness in Prokaryotic Regulatory  
413 Networks. *Annu. Rev. Microbiol.* **2010**, *64*, 257–275.  
414 <https://doi.org/10.1146/annurev.micro.091208.073229>.
- 415 (32) Shubeita, H. E.; Sambrook, J. F.; McCormick, A. M. Molecular Cloning and Analysis  
416 of Functional cDNA and Genomic Clones Encoding Bovine Cellular Retinoic Acid-  
417 Binding Protein. *Proc. Natl. Acad. Sci. U. S. A.* **1987**, *84* (16), 5645–5649.
- 418 (33) Sanches-Medeiros, A.; Monteiro, L. M. O.; Silva-Rocha, R. Calibrating Transcriptional  
419 Activity Using Constitutive Synthetic Promoters in Mutants for Global Regulators in  
420 *Escherichia Coli*. *Int J Genomics* **2018**, *2018*, 9235605.  
421 <https://doi.org/10.1155/2018/9235605>.
- 422 (34) Alves, L. de F.; Meleiro, L. P.; Silva, R. N.; Westmann, C. A.; Guazzaroni, M.-E.  
423 Novel Ethanol- and 5-Hydroxymethyl Furfural-Stimulated  $\beta$ -Glucosidase Retrieved  
424 From a Brazilian Secondary Atlantic Forest Soil Metagenome. *Front. Microbiol.* **2018**,  
425 *9*, 2556. <https://doi.org/10.3389/fmicb.2018.02556>.
- 426 (35) Thompson, J. D.; Higgins, D. G.; Gibson, T. J. CLUSTAL W: Improving the  
427 Sensitivity of Progressive Multiple Sequence Alignment through Sequence Weighting,  
428 Position-Specific Gap Penalties and Weight Matrix Choice. *Nucleic Acids Res.* **1994**,  
429 *22*, 4673–4680. <https://doi.org/10.1093/nar/22.22.4673>.
- 430 (36) Zuker, M. Mfold Web Server for Nucleic Acid Folding and Hybridization Prediction.  
431 *Nucleic Acids Res.* **2003**. <https://doi.org/10.1093/nar/gkg595>.

432

433
